# Supplementary figures and images for: Effect of Cationic Modified Microcrystalline Cellulose on the Emulsifying Properties and Water/Oil Interface Behavior of Soybean Protein Isolate
Source: MDPI journal article supplement (doi:10.3390/foods11193100), 2022-10-05

# Supplementary data

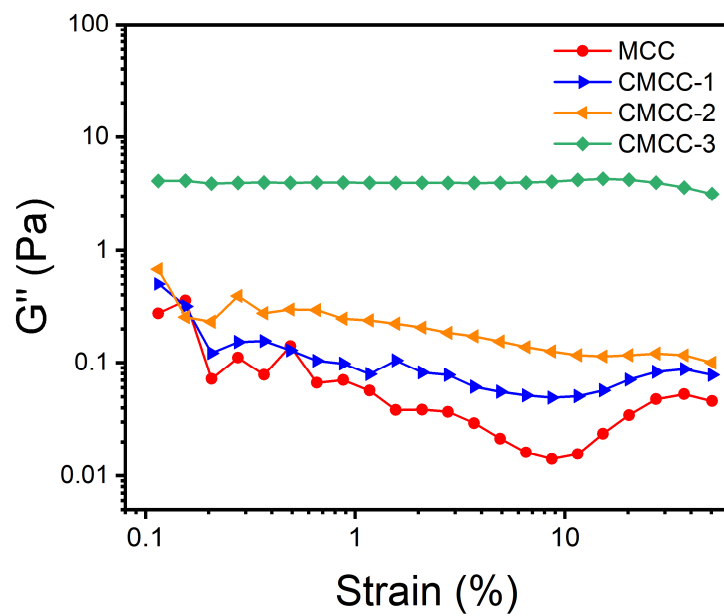

**Figure S1.** The loss modulus ( $G''$ ) of MCC and CMCC in a strain sweep test.

Supplement: s1 [file s1]
